# Supplementary material
Source: Springer Nature journal article supplement (https://www.springermedizin.de/resource/supplementary/13256_2011_2220_MOESM4_ESM.pdf/9649220)

(a)

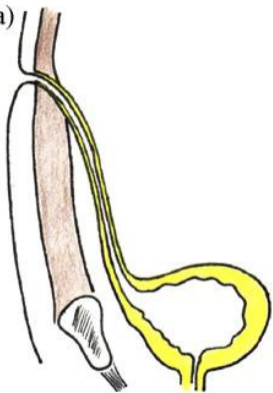

(b)

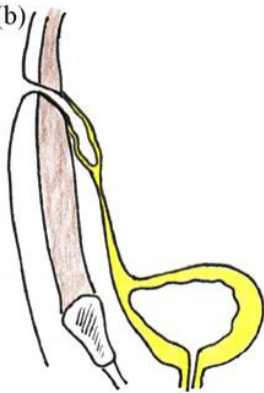

(c)

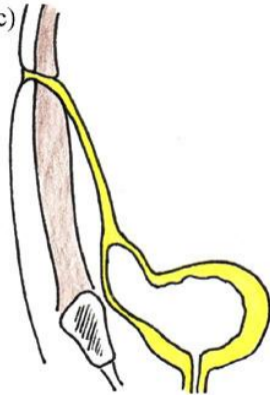

(d)

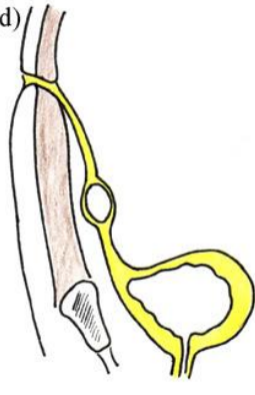

Supplement: MOESM4 [file 9649220]
